# Supplementary material for: The role of adsorbed oxygen in formic acid oxidation by Pt/TiO2 facilitated by light pre-treatment
Source: Royal Society of Chemistry journal article supplement (doi:10.1039/c6cy00939e), 2016-01-01
Supplement: c6cy00939e1.pdf [file c6cy00939e1.pdf]

Electronic Supplementary Material

**The role of adsorbed oxygen in formic acid oxidation by Pt/TiO<sub>2</sub>  
facilitated by light pre-treatment**

Wibawa H. Saputera<sup>a</sup>, Jason Scott<sup>a\*</sup>, Nathania Ganda<sup>a</sup>, Gary K-C. Low<sup>a</sup>, Rose Amal<sup>a\*</sup>

<sup>a</sup> Particles and Catalysis Research Group, School of Chemical Engineering, Faculty of Engineering, University of New South Wales, Australia

\* Correspondence should be addressed to Jason Scott and Rose Amal

Address: Tyree Energy Technology Building 348, University of New South Wales, Kensington, NSW 2052, Australia

E-mail: [jason.scott@unsw.edu.au](mailto:jason.scott@unsw.edu.au)

E-mail: [r.amal@unsw.edu.au](mailto:r.amal@unsw.edu.au)

Fax.: +61293855966

Fax.: +61293855966

Tel.: +61293857361

Tel.: +61293854361

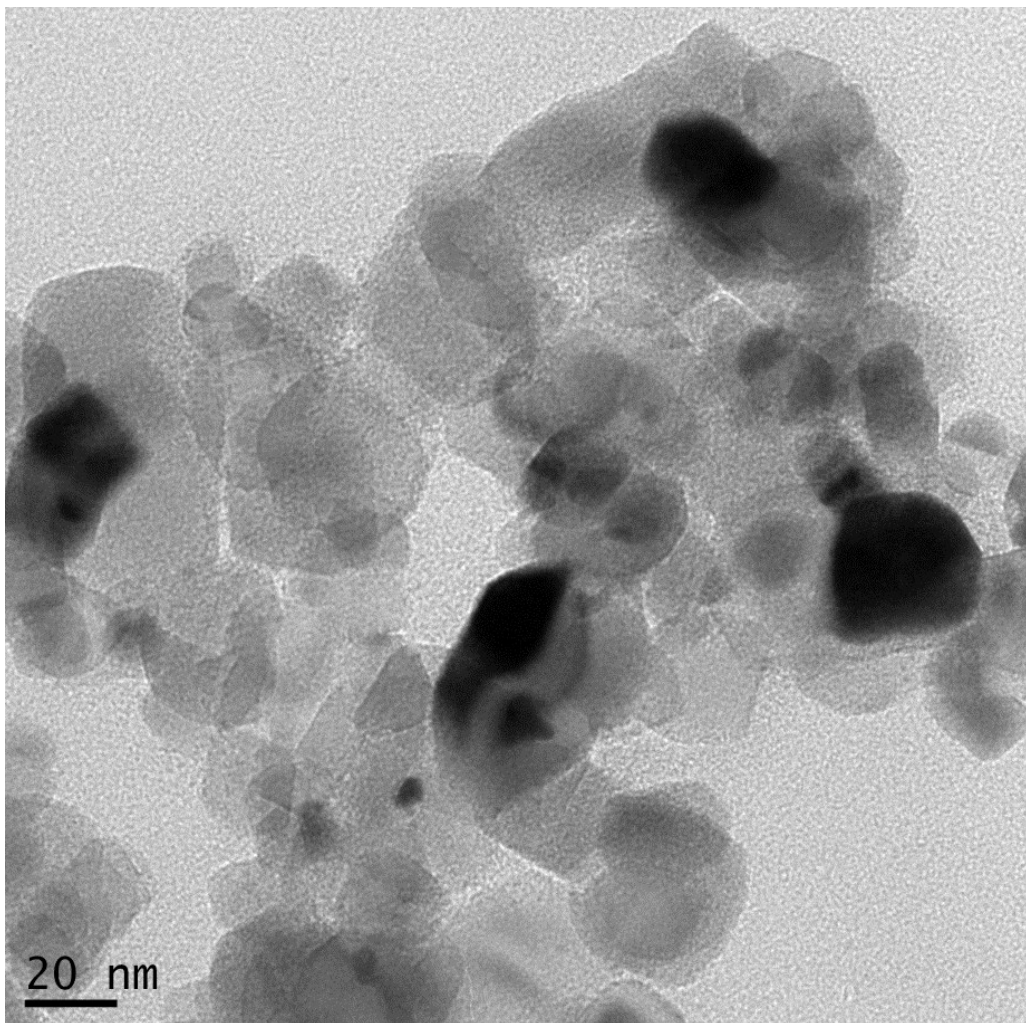

**Fig. S1** TEM image of Pt<sub>ox</sub>/TiO<sub>2</sub>. No visible Pt<sub>ox</sub> deposits are observable.

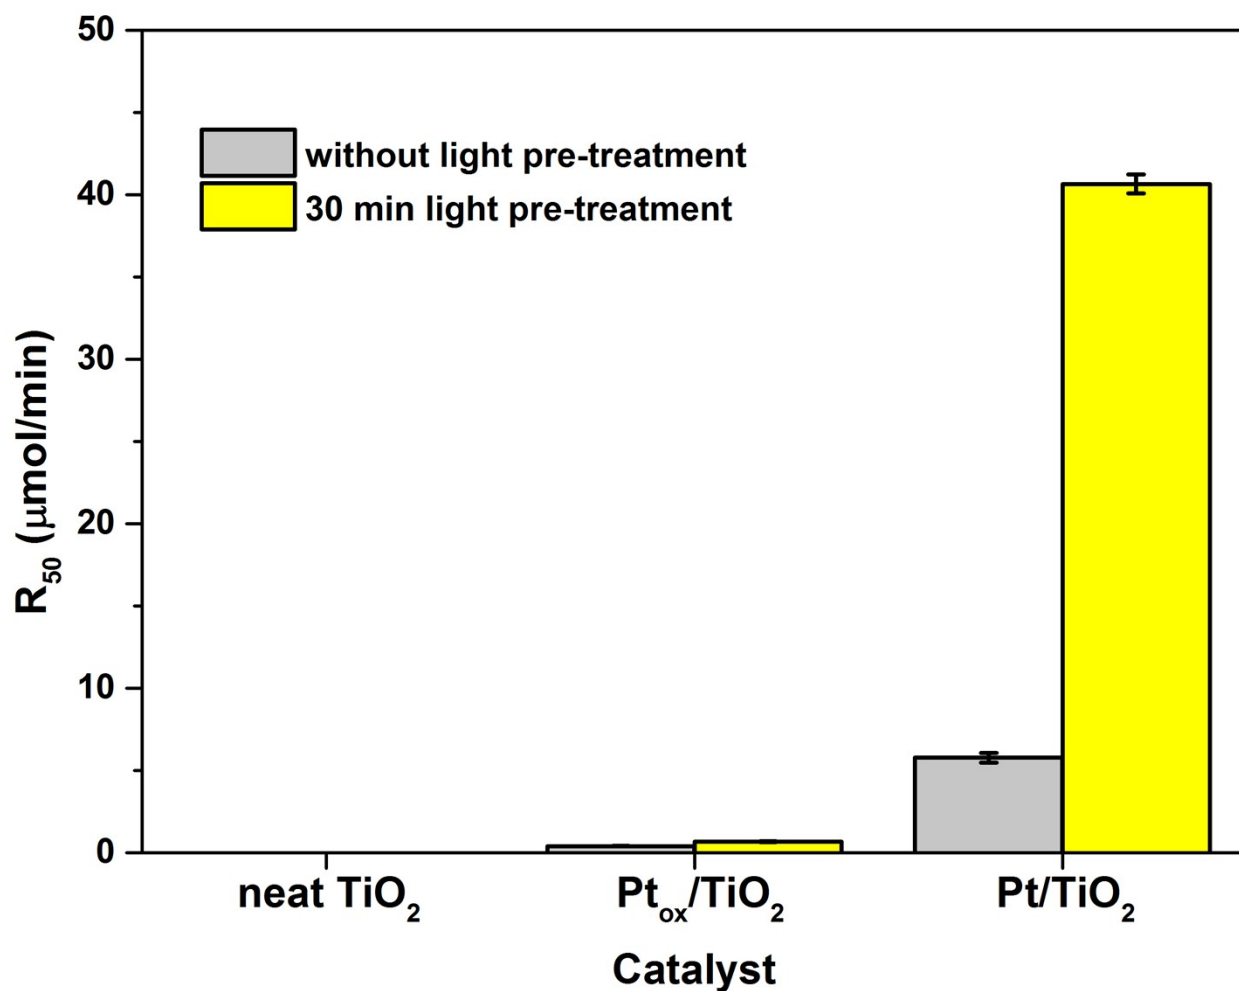

**Fig. S2** Effect of Pt oxidation states on the formic acid oxidation rate ( $R_{50}$ ) by  $\text{Pt}/\text{TiO}_2$  prior to and following light pre-treatment.  $\text{Pt}_{\text{ox}}/\text{TiO}_2$  represents  $\text{Pt}/\text{TiO}_2$  which has been calcined at  $300^\circ\text{C}$ .  $\text{Pt}/\text{TiO}_2$  represents  $\text{Pt}/\text{TiO}_2$  which has been hydrogenated at  $500^\circ\text{C}$ . Neat  $\text{TiO}_2$  is included as a control. Formic acid oxidation conditions: catalyst loading = 1 g/L; initial formic acid loading = 100  $\mu\text{mole}$ ; suspension pH =  $3 \pm 0.05$ ; air equilibration time = 10 minutes; relaxation time = 10 minutes; no illumination was performed during reaction.

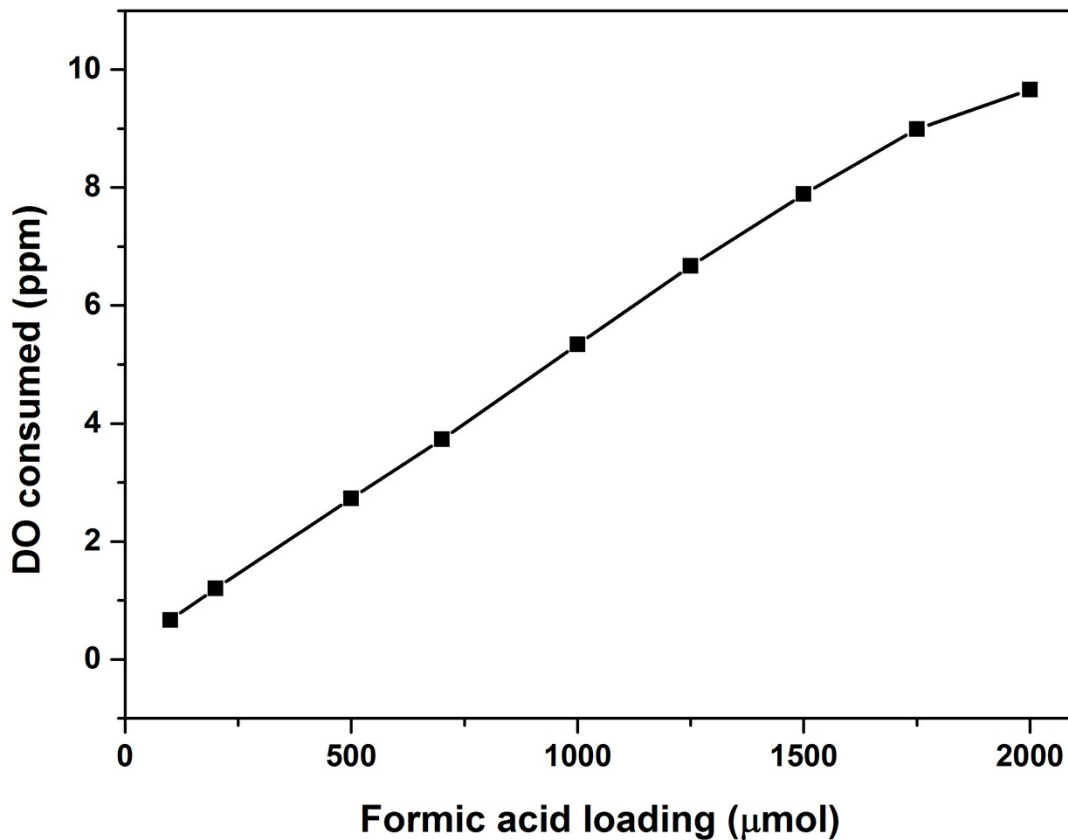

**Fig. S3** Effect of initial formic acid loading on dissolved oxygen consumed during formic acid oxidation by Pt/TiO<sub>2</sub> following UV light pre-treatment. Formic acid oxidation conditions: catalyst loading = 1 g/L; suspension pH = 3 ± 0.05; air equilibration time = 10 minutes; relaxation time = 10 minutes; no illumination was performed during reaction.

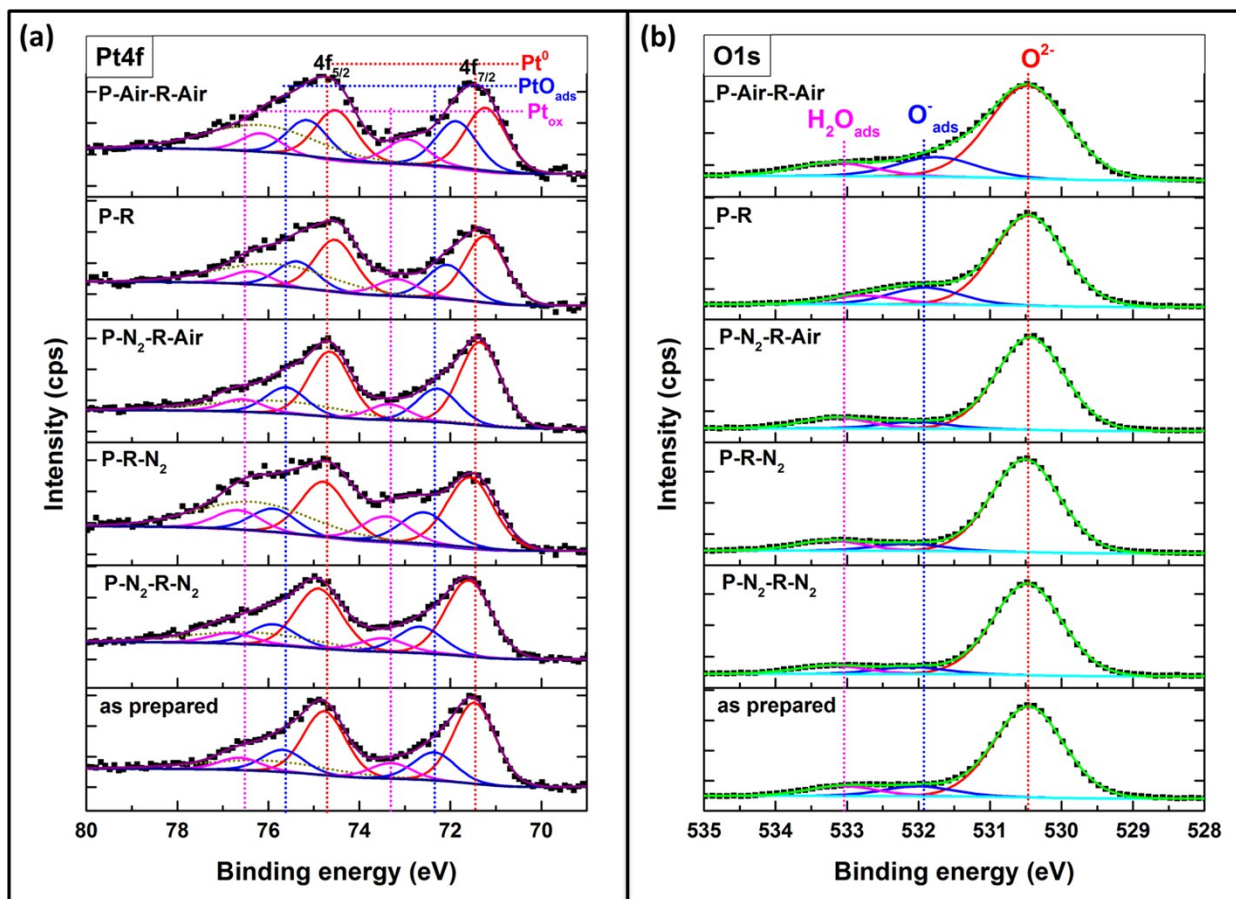

**Fig. S4** Deconvolution of (a) Pt4f and (b) O1s core levels for Pt/TiO<sub>2</sub> with different dissolved oxygen concentrations prior to formic acid injection. Peak shifts to a lower binding energy were observed for the oxygen rich condition while peak shifts to a higher binding energy were observed for the nitrogen rich condition (when compared to the as-prepared Pt/TiO<sub>2</sub>).

**Table S1** Effect of air or N<sub>2</sub> purging at various stages of the light pre-treatment-relaxation process on Pt and O speciation for Pt/TiO<sub>2</sub>.

| Pt/TiO <sub>2</sub> treatment                                                                                                                                      | Pt4f core level (%) |                    |                  | O1s core level (%) |                               |                                 |
|--------------------------------------------------------------------------------------------------------------------------------------------------------------------|---------------------|--------------------|------------------|--------------------|-------------------------------|---------------------------------|
|                                                                                                                                                                    | Pt <sup>0</sup>     | PtO <sub>ads</sub> | Pt <sub>ox</sub> | O <sup>2-</sup>    | O <sup>-</sup> <sub>ads</sub> | H <sub>2</sub> O <sub>ads</sub> |
| No light pre-treatment                                                                                                                                             | 65.2                | 21.7               | 13.1             | 82.2               | 8.9                           | 8.9                             |
| 30 min light pre-treatment ( <b>P-R</b> )                                                                                                                          | 61.7                | 28.6               | 9.7              | 77.9               | 14.6                          | 7.5                             |
| 30 min light pre-treatment with N <sub>2</sub> bubbling during light pre-treatment and relaxation stages ( <b>P-N<sub>2</sub>-R-N<sub>2</sub></b> )                | 54.2                | 25                 | 20.8             | 83.4               | 6.8                           | 9.8                             |
| 30 min light pre-treatment with N <sub>2</sub> bubbling during relaxation stage ( <b>P-R-N<sub>2</sub></b> )                                                       | 56.7                | 27.3               | 16               | 82.5               | 8.5                           | 9                               |
| 30 min light pre-treatment with N <sub>2</sub> bubbling during light pre-treatment stage and air bubbling during relaxation stage ( <b>P-N<sub>2</sub>-R-Air</b> ) | 58.4                | 28                 | 13.6             | 79.6               | 9.7                           | 10.7                            |
| 30 min light pre-treatment with air bubbling during light pre-treatment and relaxation stages ( <b>P-Air-R-Air</b> )                                               | 52.2                | 34.8               | 13               | 75.8               | 16                            | 8.2                             |
